# Supplementary material
Source: PubMed Central journal article supplement (PMC3370595)
Supplement: supp_80.6.1996_IAI-IAI06205-11-s01.pdf [file supp_80.6.1996_IAI-IAI06205-11-s01.pdf]

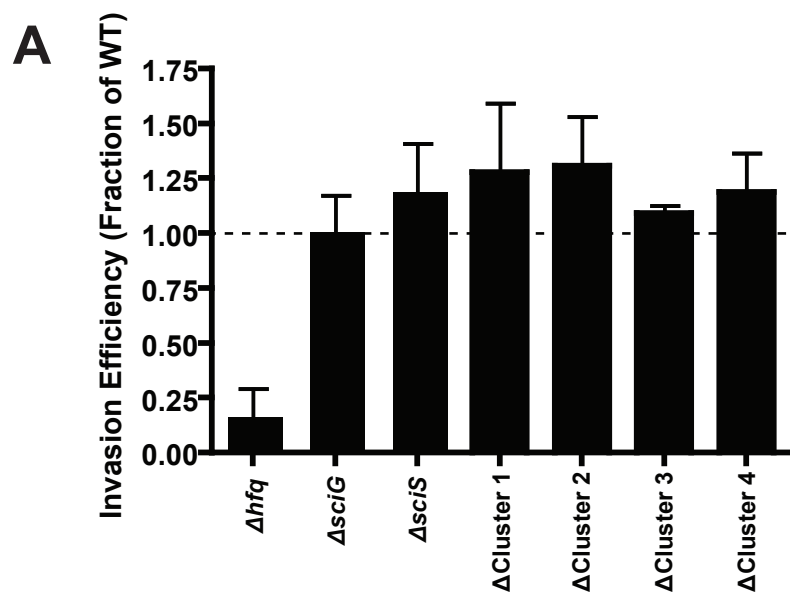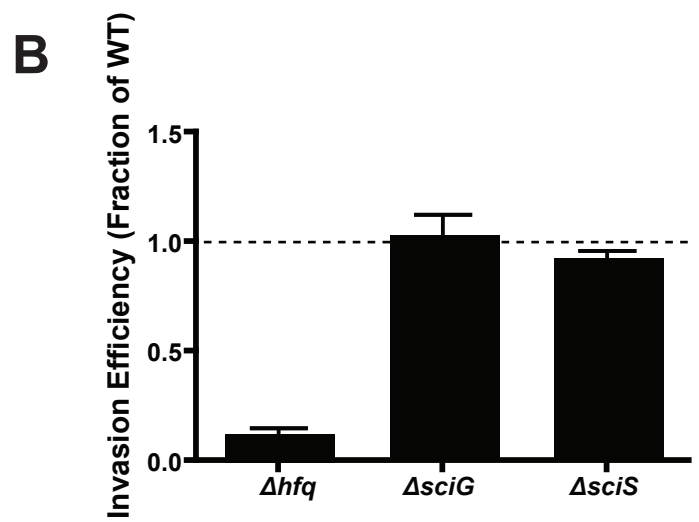

Supporting Figure S1: Invasion efficiencies of SPI-6 T6SS mutants in HeLa and HEP-2 epithelial cells. (A) In contrast with an *hfq* mutant that is deficient for invasion, core and non-core cluster mutants do not differ significantly from wild type in their ability to invade HeLa epithelial cells. (B) Similar results are observed for HEP-2 epithelial cells.
