# Supplementary material
Source: PubMed Central journal article supplement (PMC3370595)
Supplement: supp_80.6.1996_IAI-IAI06205-11-s02.pdf [file supp_80.6.1996_IAI-IAI06205-11-s02.pdf]

**A**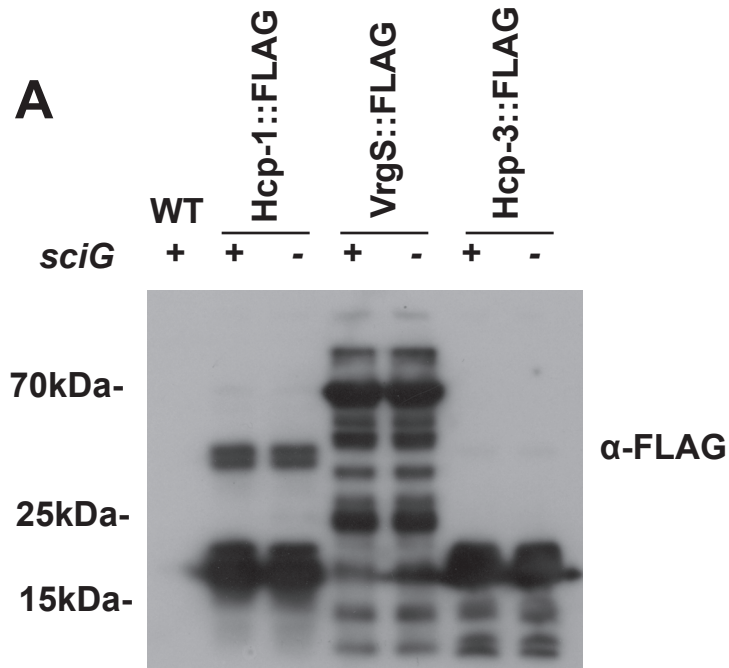**B**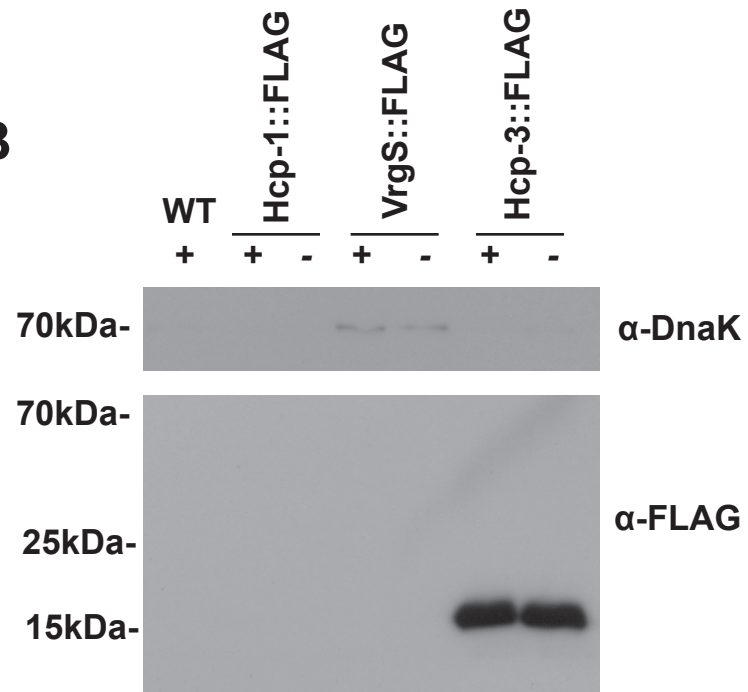

Supporting Figure S2: Expression of plasmid-encoded Hcp and VrgS C-terminal FLAG epitope fusion proteins in the minimal media LPM following IPTG induction. (A) Expression of all proteins is observed in the cytoplasmic fraction. (B) Only Hcp-3::FLAG is observed in the secreted fraction. Expression of Hcp-3::FLAG is not dependent on the ATPase *sciG*.
