# Supplementary material
Source: PubMed Central journal article supplement (PMC3370595)
Supplement: supp_80.6.1996_IAI-IAI06205-11-s03.pdf [file supp_80.6.1996_IAI-IAI06205-11-s03.pdf]

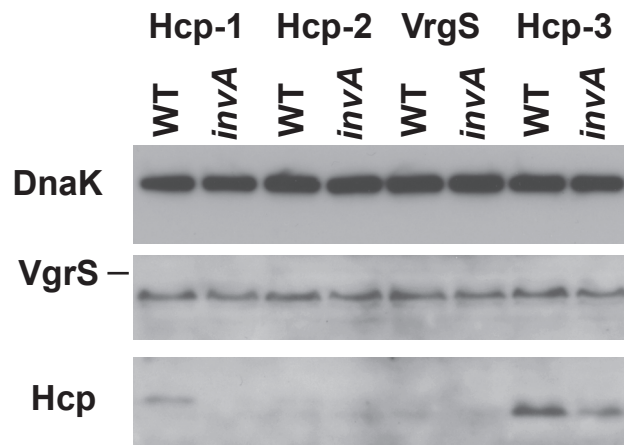

Supporting Figure S3: Expression of chromosomal-encoded Hcp and VrgS C-terminal HA epitope fusion proteins after 24 hours co-incubation with HeLa cells (A) Expression of Hcp-3::HA is observed by both wild type and invasion deficient bacteria. Hcp-2::HA and VrgS::HA expression is not observed by either wild type or invasion deficient bacteria. Expression of Hcp-1::HA is observed only by the wild type cells.
