# Supplementary material
Source: PubMed Central journal article supplement (PMC3370595)
Supplement: supp_80.6.1996_IAI-IAI06205-11-s04.pdf [file supp_80.6.1996_IAI-IAI06205-11-s04.pdf]

**A**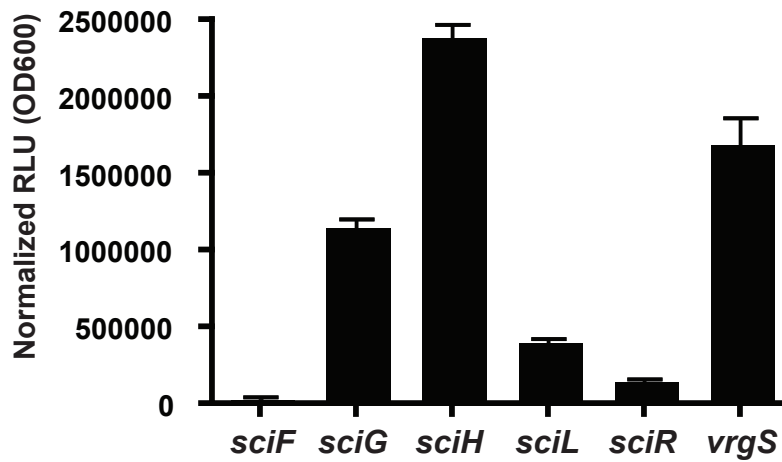**B**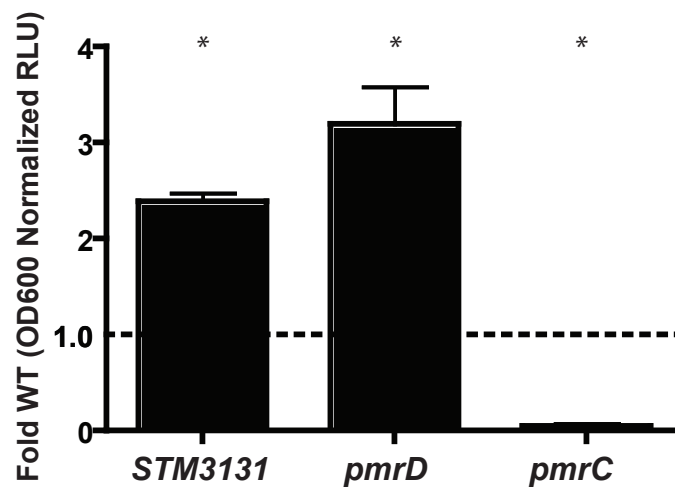

Supporting Figure S4: Transcriptional activities of the intergenic regions upstream of the indicated genes as transcriptional fusions to the *lacZ* reporter gene in merodiploid strains or to the *luxCDABE* operon on the reporter plasmid pGEN. (A) Transcriptional activity of luciferase reporters during exponential growth in the minimal media LPM at 37C with shaking at 225RPM. (C) Transcriptional activity from the region upstream of *STM3131* as a *lacZ* reporter fusion is increased in a  $\Delta pmrA$  mutant in a similar manner to that of the PmrA activated gene *pmrD* unlike the PmrA repressed gene *pmrC* (\*, P<0.05).
